# Supplementary material for: Identification and analysis of long non-coding RNAs and mRNAs in chicken macrophages infected with avian infectious bronchitis coronavirus
Source: BMC Genomics. 2021 Jan 20;22:67. doi: 10.1186/s12864-020-07359-3 (PMC7816148; doi:10.1186/s12864-020-07359-3)
Supplement: Supplementary file 3 — Additional file 3. Cis-target lncRNA prediction. [file 12864_2020_7359_MOESM3_ESM.xlsx]

## Sheet: Sheet1
cis-target lncRNA
lncRNAGeneID	Expression	lncRNATranscriptID	mRNAGeneID	Distance	lncRNAGenePos	mRNAGenePos	mRNAGeneName
MSTRG.8180	down	MSTRG.8180.7,MSTRG.8180.6	ENSGALG00000054733	57964	18[-]1291115-1389286	18[+]1173086-1233151	-
			ENSGALG00000034516	19659	18[-]1291115-1389286	18[-]1261759-1271456	SHISA6
MSTRG.2137	down	MSTRG.2137.24,MSTRG.2137.26,MSTRG.2137.21,MSTRG.2137.1,MSTRG.2137.25,MSTRG.2137.6,MSTRG.2137.5,MSTRG.2137.4,MSTRG.2137.19,MSTRG.2137.13,MSTRG.2137.12,MSTRG.2137.7,MSTRG.2137.14,MSTRG.2137.27,MSTRG.2137.29,MSTRG.2137.11,MSTRG.2137.8,MSTRG.2137.20,MSTRG.2137.16,MSTRG.2137.9,MSTRG.2137.2,MSTRG.2137.23,MSTRG.2137.18,MSTRG.2137.28,MSTRG.2137.22,MSTRG.2137.3,MSTRG.2137.17,MSTRG.2137.15,MSTRG.2137.10	ENSGALG00000054689	971	1[-]88467802-88477253	1[-]88465698-88466831	-
			ENSGALG00000015353	18625	1[-]88467802-88477253	1[+]88325470-88449177	BBX
MSTRG.21445	up	MSTRG.21445.2	ENSGALG00000012124	0	5[-]56175288-56181942	5[-]56146220-56210990	PELI2
			ENSGALG00000012118	74970	5[-]56175288-56181942	5[-]56071886-56100318	TMEM260
MSTRG.17146	down	MSTRG.17146.40,MSTRG.17146.20,MSTRG.17146.13,MSTRG.17146.42,MSTRG.17146.22,MSTRG.17146.25,MSTRG.17146.43,MSTRG.17146.54,MSTRG.17146.84,MSTRG.17146.23,MSTRG.17146.78,MSTRG.17146.44,MSTRG.17146.41,MSTRG.17146.21	ENSGALG00000052430	0	31[+]3070861-4413258	31[+]4086872-4101718	-
			ENSGALG00000054321	7333	31[+]3070861-4413258	31[+]3061101-3063528	-
			ENSGALG00000052334	0	31[+]3070861-4413258	31[+]3203850-3205886	-
			ENSGALG00000051010	2530	31[+]3070861-4413258	31[-]3066132-3068331	-
			ENSGALG00000049660	0	31[+]3070861-4413258	31[+]3824746-3828847	-
			ENSGALG00000052568	0	31[+]3070861-4413258	31[+]3167300-3171427	-
			ENSGALG00000031624	0	31[+]3070861-4413258	31[+]3145865-3146927	-
			ENSGALG00000044801	0	31[+]3070861-4413258	31[-]3434861-3444008	CHIR-B5
			ENSGALG00000045090	0	31[+]3070861-4413258	31[+]3688164-3690300	-
			ENSGALG00000050824	0	31[+]3070861-4413258	31[-]4071719-4073770	-
			ENSGALG00000048989	0	31[+]3070861-4413258	31[-]3521960-3524425	-
			ENSGALG00000046135	0	31[+]3070861-4413258	31[-]4280400-4283603	-
			ENSGALG00000029868	0	31[+]3070861-4413258	31[-]3255944-3257567	-
			ENSGALG00000049047	0	31[+]3070861-4413258	31[-]3961269-3961927	-
			ENSGALG00000032041	55175	31[+]3070861-4413258	31[+]3014597-3015686	-
			ENSGALG00000050408	0	31[+]3070861-4413258	31[-]3811868-3813723	-
			ENSGALG00000044709	0	31[+]3070861-4413258	31[+]3652779-3654238	-
			ENSGALG00000050921	47934	31[+]3070861-4413258	31[+]3020724-3022927	-
			ENSGALG00000050785	0	31[+]3070861-4413258	31[+]4031980-4036797	-
			ENSGALG00000033729	0	31[+]3070861-4413258	31[-]3499258-3500775	-
			ENSGALG00000049114	40464	31[+]3070861-4413258	31[-]3020304-3030397	-
			ENSGALG00000053626	0	31[+]3070861-4413258	31[+]3200114-3202596	-
			ENSGALG00000048116	0	31[+]3070861-4413258	31[+]3074472-3076550	-
			ENSGALG00000049503	0	31[+]3070861-4413258	31[+]3688164-3695009	-
			ENSGALG00000052373	0	31[+]3070861-4413258	31[+]3324581-3327252	-
			ENSGALG00000048929	0	31[+]3070861-4413258	31[-]4355910-4357632	-
			ENSGALG00000048562	0	31[+]3070861-4413258	31[-]3705574-3707691	-
			ENSGALG00000039866	0	31[+]3070861-4413258	31[-]4158743-4159570	-
			ENSGALG00000049433	21754	31[+]3070861-4413258	31[+]3045980-3049107	-
			ENSGALG00000051713	0	31[+]3070861-4413258	31[-]4148186-4151071	-
			ENSGALG00000045823	0	31[+]3070861-4413258	31[-]3601988-3607825	-
			ENSGALG00000033787	0	31[+]3070861-4413258	31[-]3774720-3775734	-
			ENSGALG00000054158	0	31[+]3070861-4413258	31[-]4179483-4181854	-
			ENSGALG00000041961	0	31[+]3070861-4413258	31[-]3837390-3838127	-
			ENSGALG00000052122	0	31[+]3070861-4413258	31[-]3424053-3426080	-
			ENSGALG00000054769	0	31[+]3070861-4413258	31[+]4037869-4038602	-
			ENSGALG00000034411	0	31[+]3070861-4413258	31[+]3420029-3421933	-
			ENSGALG00000052010	0	31[+]3070861-4413258	31[-]4261532-4263818	-
			ENSGALG00000051627	0	31[+]3070861-4413258	31[-]4394329-4396012	-
			ENSGALG00000051602	0	31[+]3070861-4413258	31[-]4324632-4329707	-
			ENSGALG00000049046	24178	31[+]3070861-4413258	31[+]3045646-3046683	-
			ENSGALG00000053566	0	31[+]3070861-4413258	31[-]3400756-3402268	-
			ENSGALG00000053004	65470	31[+]3070861-4413258	31[-]3004302-3005391	-
			ENSGALG00000054765	0	31[+]3070861-4413258	31[+]4043878-4059696	-
			ENSGALG00000050595	0	31[+]3070861-4413258	31[-]4218966-4221307	-
			ENSGALG00000047699	41972	31[+]3070861-4413258	31[-]4455230-4457192	-
			ENSGALG00000050737	45117	31[+]3070861-4413258	31[+]3024382-3025744	-
			ENSGALG00000042500	0	31[+]3070861-4413258	31[-]3738213-3740679	-
			ENSGALG00000044093	0	31[+]3070861-4413258	31[-]3972602-3973117	-
			ENSGALG00000049317	0	31[+]3070861-4413258	31[+]4043866-4046006	-
			ENSGALG00000044439	0	31[+]3070861-4413258	31[-]4299222-4300048	-
			ENSGALG00000037650	0	31[+]3070861-4413258	31[-]3126824-3129589	-
			ENSGALG00000050896	0	31[+]3070861-4413258	31[-]3178175-3180013	-
			ENSGALG00000049682	0	31[+]3070861-4413258	31[+]4380382-4383366	CHIR-B2
			ENSGALG00000054171	34505	31[+]3070861-4413258	31[+]4447763-4451147	CHIR-A2
			ENSGALG00000050820	0	31[+]3070861-4413258	31[+]3841638-3842888	-
			ENSGALG00000053734	30345	31[+]3070861-4413258	31[-]4443603-4457497	-
MSTRG.17146.20	down
MSTRG.6458.12	down	-	-	-	-	-
MSTRG.15811	down	MSTRG.15811.5,MSTRG.15811.6	ENSGALG00000013900	74300	3[+]55332247-55346794	3[+]55160010-55257947	MAP7
			ENSGALG00000013912	48592	3[+]55332247-55346794	3[-]55260164-55283655	-
			ENSGALG00000013941	6732	3[+]55332247-55346794	3[-]55353526-55514981	PDE7B
			ENSGALG00000019967	463	3[+]55332247-55346794	3[+]55321006-55331784	MTFR2
			ENSGALG00000013935	0	3[+]55332247-55346794	3[+]55290293-55506996	BCLAF1
MSTRG.14220	down	MSTRG.14220.9,MSTRG.14220.10,MSTRG.14220.4,MSTRG.14220.5,MSTRG.14220.3,MSTRG.14220.8,MSTRG.14220.1,MSTRG.14220.7	ENSGALG00000012984	88490	28[-]1198827-1203405	28[-]1291895-1303396	-
			ENSGALG00000000784	67911	28[-]1198827-1203405	28[+]1099554-1130916	PIP5K1C
			ENSGALG00000054634	0	28[-]1198827-1203405	28[+]1197427-1200633	-
			ENSGALG00000024391	60385	28[-]1198827-1203405	28[+]1133936-1138442	CACTIN
			ENSGALG00000053742	32982	28[-]1198827-1203405	28[+]1160094-1165845	-
			ENSGALG00000047801	49236	28[-]1198827-1203405	28[-]1146421-1149591	GIPC3
			ENSGALG00000017524	9506	28[-]1198827-1203405	28[+]1185679-1189321	DOHH
			ENSGALG00000002085	17521	28[-]1198827-1203405	28[-]1169318-1181306	FZR1
			ENSGALG00000041371	60012	28[-]1198827-1203405	28[+]1263417-1290391	-
			ENSGALG00000041643	15	28[-]1198827-1203405	28[-]1203420-1242963	NFIC
			ENSGALG00000000795	37127	28[-]1198827-1203405	28[+]1155041-1161700	MFSD12
			ENSGALG00000027838	45881	28[-]1198827-1203405	28[-]1148165-1152946	HMG20B
			ENSGALG00000039733	14433	28[-]1198827-1203405	28[+]1181751-1184394	-
			ENSGALG00000037888	53288	28[-]1198827-1203405	28[+]1140092-1145539	TBXA2R
MSTRG.2137	up	MSTRG.2137.7	ENSGALG00000054689	971	1[-]88467802-88477253	1[-]88465698-88466831	-
			ENSGALG00000015353	18625	1[-]88467802-88477253	1[+]88325470-88449177	BBX
MSTRG.22512	down	MSTRG.22512.1	ENSGALG00000037778	67888	7[-]179576-182559	7[-]93419-111688	NAB1
			ENSGALG00000033017	44090	7[-]179576-182559	7[-]226649-230837	C2orf88
			ENSGALG00000040817	31182	7[-]179576-182559	7[+]134720-148394	NEMP2
			ENSGALG00000043307	5205	7[-]179576-182559	7[+]187764-224770	HIBCH
			ENSGALG00000039458	69789	7[-]179576-182559	7[+]252348-257840	GDF8
			ENSGALG00000041884	6325	7[-]179576-182559	7[-]151197-173251	MFSD6
MSTRG.11436	down	MSTRG.11436.5,MSTRG.11436.3,MSTRG.11436.6,MSTRG.11436.2,MSTRG.11436.4	ENSGALG00000042375	90972	2[+]131118214-131122199	2[+]131213171-131252088	-
			ENSGALG00000048025	65765	2[+]131118214-131122199	2[+]131187964-131207918	-
			ENSGALG00000048064	36499	2[+]131118214-131122199	2[+]131158698-131165907	-
			ENSGALG00000054424	71878	2[+]131118214-131122199	2[+]131044996-131046336	-
			ENSGALG00000047027	5270	2[+]131118214-131122199	2[-]131127469-131154245	-
			ENSGALG00000050153	97799	2[+]131118214-131122199	2[-]131018916-131020415	-
			ENSGALG00000054187	52687	2[+]131118214-131122199	2[+]131174886-131186117	-
			ENSGALG00000049028	18486	2[+]131118214-131122199	2[+]131097427-131099728	-
