# Supplementary material for: Identification and analysis of long non-coding RNAs and mRNAs in chicken macrophages infected with avian infectious bronchitis coronavirus
Source: BMC Genomics. 2021 Jan 20;22:67. doi: 10.1186/s12864-020-07359-3 (PMC7816148; doi:10.1186/s12864-020-07359-3)
Supplement: Supplementary file 6 — Additional file 6. lncRNA-miRNA-mRNA network. [file 12864_2020_7359_MOESM6_ESM.xlsx]

## Sheet: Sheet1
miRNA ID	lncRNA ID
gga-miR-30d	MSTRG.8180.7
gga-miR-30d	MSTRG.9359.3
gga-miR-30d	MSTRG.3559.1
gga-miR-30d	ENSGALT00000102136
gga-miR-30d	ENSGALT00000096828
gga-miR-30d	MSTRG.2424.5
gga-miR-30d	MSTRG.17935.12
gga-miR-30d	MSTRG.2824.2
gga-miR-30d	MSTRG.25416.41
gga-miR-30d	MSTRG.25092.11
gga-miR-30d	MSTRG.993.3
gga-miR-30d	MSTRG.993.2
gga-miR-30d	MSTRG.25092.8
gga-miR-30d	MSTRG.25416.43
gga-miR-30d	MSTRG.12602.1
gga-miR-30d	ENSGALT00000095670
gga-miR-30d	ENSGALT00000094718
gga-miR-30d	MSTRG.25092.7
gga-miR-30d	MSTRG.12602.4
gga-miR-30d	MSTRG.15550.10
gga-miR-30d	MSTRG.4755.14
gga-miR-30d	MSTRG.16094.3
gga-miR-30d	ENSGALT00000091386
gga-miR-30d	ENSGALT00000101150
gga-miR-30d	MSTRG.21445.2
gga-miR-30d	MSTRG.9359.1
gga-miR-30d	ENSGALT00000104335
gga-miR-30d	MSTRG.8517.2
gga-miR-30d	MSTRG.21635.1
gga-miR-30d	MSTRG.22271.3
gga-miR-146a-5p	MSTRG.21445.2
gga-miR-146a-5p	MSTRG.16758.6
gga-miR-146a-5p	MSTRG.7587.15
gga-miR-146a-5p	MSTRG.1579.4
gga-miR-146a-5p	ENSGALT00000107809
gga-miR-146a-5p	ENSGALT00000104335
gga-miR-146a-5p	MSTRG.15550.10
gga-miR-146a-5p	MSTRG.4755.14
gga-miR-146a-5p	MSTRG.20533.5
gga-miR-146a-5p	MSTRG.2850.6
gga-miR-146a-5p	MSTRG.4074.5
gga-miR-146a-5p	MSTRG.11437.17
gga-miR-146a-5p	MSTRG.25436.3
gga-miR-146a-5p	MSTRG.4074.6
gga-miR-146a-5p	MSTRG.22271.3
gga-miR-146a-5p	MSTRG.19505.3
gga-miR-146a-5p	MSTRG.15141.2
gga-miR-146a-5p	MSTRG.4074.4
gga-miR-146a-5p	MSTRG.8180.7
gga-miR-146a-5p	MSTRG.15811.5
gga-miR-146a-5p	MSTRG.27094.4
gga-miR-146a-5p	MSTRG.10068.9
gga-miR-146a-5p	MSTRG.3765.1
gga-miR-146a-5p	MSTRG.10068.2
gga-miR-146a-5p	ENSGALT00000094718
gga-miR-146a-5p	ENSGALT00000095670
gga-miR-146a-5p	MSTRG.8519.2
gga-miR-146a-5p	MSTRG.11437.13
gga-miR-146a-5p	MSTRG.25373.1
gga-miR-146a-5p	MSTRG.17307.22
gga-miR-146a-5p	MSTRG.15649.6
gga-miR-146a-5p	MSTRG.17145.106
